# Supplementary material for: Pharmacological Evaluation of the SCID T Cell Transfer Model of Colitis: As a Model of Crohn's Disease
Source: Hindawi journal article supplement (doi:10.1155/2012/412178), 2012-01-01
Supplement: f1 [file 412178.f1.pdf]

Supplementary Table 1 (ST1)

Percent weight loss at post mortem (mean, SEM). Prevention study

| Treatment                  | Cells + vehicle | Cells + Trx | Healthy    | P value  |
|----------------------------|-----------------|-------------|------------|----------|
| Anti-TNF- $\alpha$         | -8.6 (2.5)      | 3.8 (0.9)   | 6.0 (1.5)  | < 0.001  |
| TNFR-Fc                    | -8.5 (2.2)      | 1.2 (2.0)   | 10 (0.6)   | < 0.01   |
| Anti-IL-12p40              | -14(2.4)        | -1.0 (0.9)  | 2.2 (1.0)  | < 0.001  |
| Anti-IL-6                  | -8.5 (2.5)      | 4.3 (2.5)   | 5.1 (2.6)  | < 0.01   |
| CTLA4-Ig                   | -5.5 (2.6)      | 6.5 (1.6)   | 6.4 (1.9)  | < 0.01   |
| Anti- $\alpha$ 4 $\beta$ 7 | -14 (2.4)       | 3.2 (1.1)   | 2.2 (1.0)  | < 0.0001 |
| Enro + Metro               | -7.7 (1.8)      | -4.5 (1.0)  | 4.8 (1.8)* | ns       |
| Cyclosporine               | -6.0 (2.8)      | -6.6 (2.8)  | 5.0 (1.6)  | ns       |

\*Unreconstituted, treated: -4.7 (1.7). Note that mice lost weight prior to transfer due to refusal to drink the antibiotics.

Supplementary Table 2 (ST2)

Fecal score at post mortem (median, min-max). Prevention study

| Treatment                  | Cells + vehicle | Cells + Trx | Healthy | P value |
|----------------------------|-----------------|-------------|---------|---------|
| Anti-TNF- $\alpha$         | 3 (2-3)         | 2 (1-2)     | 0.5     | < 0.001 |
| TNFR-Fc*                   | 3 (0-4)         | 1 (1-3)     | 0       | ns      |
| Anti-IL-12p40              | 2 (0-2)         | 2 (1-2)     | 0.5     | ns      |
| Anti-IL-6                  | 2 (1-4)         | 1 (0-2)     | 1       | < 0.01  |
| CTLA4-Ig                   | 2 (0-3)         | 1 (0-1)     | 0.5     | < 0.01  |
| Anti- $\alpha$ 4 $\beta$ 7 | 2 (0-2)         | 1 (0-1)     | 0.5     | < 0.01  |
| Enro + Metro**             | 2.5 (1-4)       | 1 (1-1)     | 0       | < 0.001 |
| Cyclosporine               | 2 (0-3)         | 2 (1-3)     | 0       | ns      |

\*Scores for week three. No improvement for TNFR-Fc group in week four.\*\* Unreconstituted, treated: 1 (0-1)

Supplementary Table 3 (ST3)

WBC count  $\times 10^9/L$  at post mortem (mean, SEM). Prevention study

| Treatment                  | Cells + vehicle | Cells + Trx | Healthy   | P value |
|----------------------------|-----------------|-------------|-----------|---------|
| Anti-TNF- $\alpha$         | 2.7 (0.3)       | 1.3 (0.1)   | 0.8 (0.1) | < 0.001 |
| TNFR-Fc                    | 4.1 (0.4)       | 3.5 (0.5)   | 1.3 (0.2) | ns      |
| Anti-IL-12p40              | 3.9 (0.4)       | 2.6 (0.2)   | 1.7 (0.4) | < 0.05  |
| Anti-IL-6                  | 3.3 (0.4)       | 3.2 (0.3)   | 1.7 (0.6) | ns      |
| CTLA4-Ig                   | 4.5 (0.4)       | 2.7 (0.2)   | 2.0 (0.2) | < 0.01  |
| Anti- $\alpha$ 4 $\beta$ 7 | 3.9 (0.4)       | 3.7 (0.2)   | 1.7 (0.4) | ns      |
| Enro + Metro*              | 3.6 (0.6)       | 2.2 (0.2)   | 2.2 (0.3) | < 0.05  |
| Cyclosporine               | 3.2 (0.5)       | 5.3 (0.7)   | 1.5 (0.1) | < 0.05  |

\* Unreconstituted, treated: 2.1 (0.5)

Supplementary Table 4 (ST4)

Colonic weight:length ratio (mean, SEM). Prevention study

| Treatment                  | Cells + vehicle | Cells + Trx | Healthy  | P value  |
|----------------------------|-----------------|-------------|----------|----------|
| Anti-TNF- $\alpha$         | 53 (1.9)        | 29 (1.2)    | 28 (1.8) | < 0.001  |
| TNFR-Fc                    | 43 (2.3)        | 38 (2.3)    | 22 (1.0) | ns       |
| Anti-IL-12p40              | 43 (3.0)        | 28 (1.7)    | 25 (1.5) | < 0.001  |
| Anti-IL-6                  | 44 (3.4)        | 34 (2.4)    | 23 (2.1) | < 0.05   |
| CTLA4-Ig                   | 45 (2.3)        | 30 (1.9)    | 23 (1.7) | < 0.001  |
| Anti- $\alpha$ 4 $\beta$ 7 | 43 (3.0)        | 30 (1.2)    | 25 (1.5) | < 0.01   |
| Enro + Metro*              | 40 (2.5)        | 18 (0.6)    | 24 (0.5) | < 0.0001 |
| Cyclosporine               | 36 (3.1)        | 40 (1.7)    | 25 (1.4) | ns       |

\* Unreconstituted, treated: 19 (1.2)

Supplementary Table 5 (ST5)

Histological score (median, min-max). Prevention study

| Treatment                  | Cells + vehicle | Cells + Trx | Healthy | P value  |
|----------------------------|-----------------|-------------|---------|----------|
| Anti-TNF- $\alpha$         | 9 (6-12)        | 1.5 (0-6)   | 0       | < 0.0001 |
| TNFR-Fc                    | ND              | ND          | ND      |          |
| Anti-IL-12p40              | 9.5 (6-12)      | 3 (0-6)     | 0       | < 0.001  |
| Anti-IL-6                  | 6 (0-9)         | 0 (0-8)     | 0       | < 0.05   |
| CTLA4-Ig**                 | 9 (0-11)        | 0 (0-0)     | 0       | < 0.05   |
| Anti- $\alpha$ 4 $\beta$ 7 | 9.5 (6-12)      | 4 (3-8)     | 0       | < 0.01   |
| Enro + Metro*              | 9 (5-9)         | 0 (0-3)     | 0       | < 0.001  |
| Cyclosporine               | 9 (4-12)        | 9 (7-10)    | 0       | ns       |

ND: Not determined. \*Unreconstituted, treated: 0 (0-3).\*\*Used Wilcoxon Signed Rank test and compared with a hypothetical value of 0.0 since all scores were 0 in the CTLA4-Ig group.

Supplementary Table 6 (ST6)

Percent weight loss at post mortem (mean, SEM). Intervention study

| Treatment                  | Cells + vehicle | Cells + Trx | Healthy   | P value  |
|----------------------------|-----------------|-------------|-----------|----------|
| Anti-TNF- $\alpha$         | -11 (2.9)       | -2.5 (2.5)  | 9.2 (1.3) | < 0.05   |
| TNFR-Fc                    | -4.8 (3.3)      | -10 (2.9)   | 8.0 (2.4) | ns       |
| Anti-IL-12p40              | -14 (2.1)       | 2.2 (1.7)   | 9.2 (1.3) | < 0.0001 |
| Anti-IL-6                  | -10 (3.2)       | -12 (2.8)   | 5.1 (2.6) | ns       |
| CTLA4-Ig                   | -5.6 (3.4)      | 7.5 (1.4)   | 9.2 (1.3) | < 0.01   |
| Anti- $\alpha$ 4 $\beta$ 7 | -14 (2.1)       | -8.5 (2.9)  | 9.2 (1.3) | ns       |
| Enro + metro               | -7.5 (1.9)      | 2.2 (1.8)   | 9.4 (2.2) | < 0.01   |

Supplementary Table 7 (ST7)

Fecal score at post mortem (median, min-max). Intervention study

| Treatment                  | Cells + vehicle | Cells + Trx | Healthy | P value  |
|----------------------------|-----------------|-------------|---------|----------|
| Anti-TNF- $\alpha$         | 2 (1-4)         | 2 (0-3)     | 1       | ns       |
| TNFR-Fc                    | 4 (2-4)         | 3 (0-3)     | 0       | ns       |
| Anti-IL-12p40              | 2 (1-3)         | 1.5 (0-2)   | 1       | ns       |
| Anti-IL-6                  | 2 (1-3)         | 2 (1-3)     | 1       | ns       |
| CTLA4-Ig                   | 2 (0-3)         | 0.5 (0-1)   | 1       | < 0.01   |
| Anti- $\alpha$ 4 $\beta$ 7 | 2 (1-3)         | 2 (1-3)     | 1       | ns       |
| Enro + metro               | 3 (2-4)         | 1 (0-1)     | 1       | < 0.0001 |

Supplementary Table 8 (ST8)

WBC count  $\times 10^9/L$  at post mortem (mean, SEM). Intervention study

| Treatment                  | Cells + vehicle | Cells + Trx | Healthy   | P value |
|----------------------------|-----------------|-------------|-----------|---------|
| Anti-TNF- $\alpha$         | 5.4 (0.5)       | 4.2 (0.6)   | 1.3 (0.2) | ns      |
| TNFR-Fc                    | 4.6 (0.8)       | 5.7 (0.6)   | 1.6 (0.3) | ns      |
| Anti-IL-12p40              | 4.9 (0.5)       | 2.8 (0.3)   | 1.3 (0.2) | 0.001   |
| Anti-IL-6                  | 3.4 (0.4)       | 3.9 (0.4)   | 1.7 (0.6) | ns      |
| CTLA4-Ig                   | 4.8 (0.4)       | 2.4 (0.3)   | 1.3 (0.2) | < 0.001 |
| Anti- $\alpha$ 4 $\beta$ 7 | 4.9 (0.5)       | 4.9 (0.6)   | 1.3 (0.2) | ns      |
| Enro + metro               | 4.7 (0.3)       | 3.0 (0.3)   | 1.3 (0.5) | < 0.001 |

Supplementary Table 9 (ST9)

Colonic weight:length ratio (mean, SEM). Intervention study

| Treatment                  | Cells + vehicle | Cells + Trx | Healthy  | P value  |
|----------------------------|-----------------|-------------|----------|----------|
| Anti-TNF- $\alpha$         | 45 (2.6)        | 40 (3.4)    | 21 (2.1) | ns       |
| TNFR-Fc                    | 43 (2.6)        | 46 (2.1)    | 28 (2.9) | ns       |
| Anti-IL-12p40              | 41 (2.2)        | 32 (1.0)    | 21 (2.1) | < 0.01   |
| Anti-IL-6                  | 50 (3.1)        | 47 (2.9)    | 23 (2.1) | ns       |
| CTLA4-Ig                   | 43 (2.4)        | 30 (2.0)    | 21 (2.1) | < 0.001  |
| Anti- $\alpha$ 4 $\beta$ 7 | 41 (2.2)        | 43 (1.8)    | 21 (2.1) | ns       |
| Enro + metro               | 53 (3.4)        | 27 (1.6)    | 27 (1.9) | < 0.0001 |

Supplementary Table 10 (ST10)

Histological score (median, min-max). Intervention study

| Treatment                  | Cells + vehicle | Cells + Trx | Healthy | P value |
|----------------------------|-----------------|-------------|---------|---------|
| Anti-TNF- $\alpha$         | 11 (4-13)       | 8.5 (0-12)  | 0 (0-0) | ns      |
| TNFR-Fc                    | ND              | ND          | ND      |         |
| Anti-IL-12p40              | 11 (3-13)       | 4.5 (0-10)  | 0 (0-0) | < 0.05  |
| Anti-IL-6                  | 7 (5-10)        | 9 (5-12)    | 0 (0-0) | ns      |
| CTLA4-Ig                   | 10 (8-13)       | 4.5 (0-9)   | 0 (0-0) | < 0.001 |
| Anti- $\alpha$ 4 $\beta$ 7 | 11 (3-13)       | 10 (7-13)   | 0 (0-0) | ns      |
| Enro + metro               | 11 (3-12)       | 0 (0-6)     | 0 (0-0) | < 0.001 |

## Prevention / Intervention

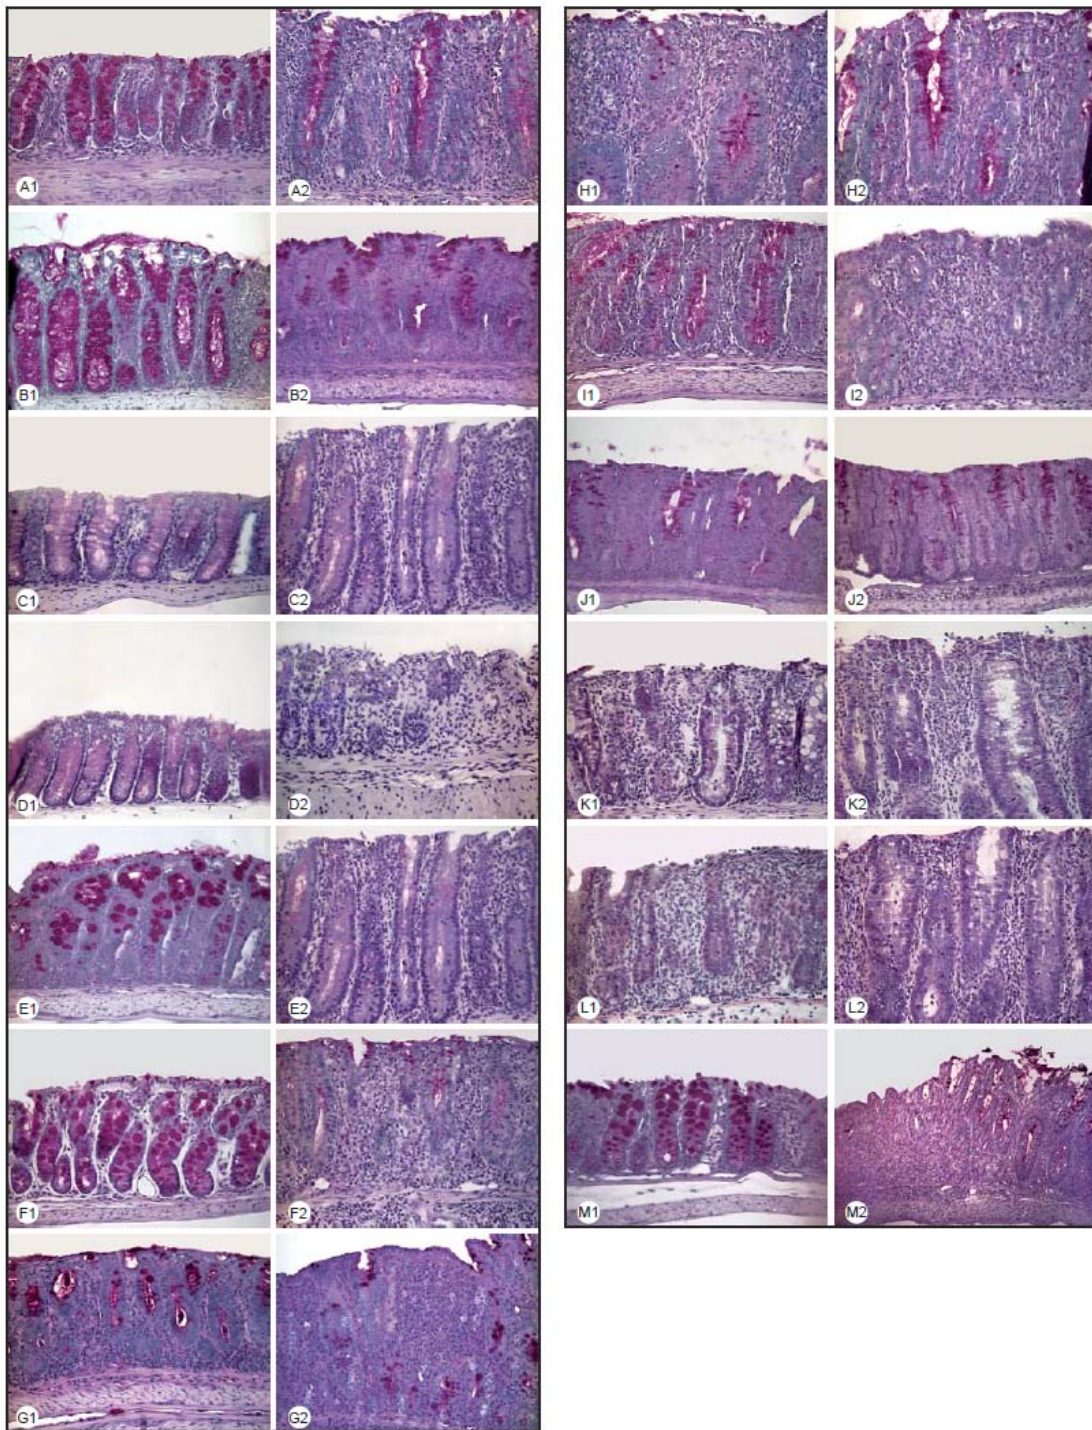

Supplementary figure 1 (SF1): Histopathologic appearance of colon after treatment with compounds or controls. Photomicrographs representative of the mean score of the individual groups. A1-G1 and A2-G2 are from the groups treated with compounds (1) and controls (2), respectively in the prevention study. H1-M1 and H2-M2 represent the compound (1) and control (2) groups in the intervention study. A, H: anti-TNF- $\alpha$ , B, I: anti-IL-12p40; C, J: anti-IL-6; D, K: CTLA4-Ig; E, L: anti- $\alpha$ 4 $\beta$ 7; F, M: enrofloxacin and metronidazole; G: cyclosporine. H&E PAS stain, original magnification x 25.
